# Supplementary material
Source: PubMed Central journal article supplement (PMC4397982)

**Supplemental Figure 1.** RT-PCR assessment of EWS-FLI1 translocation in 2D monolayer culture of ES cell lines, in vivo EW5 xenografts, or in 3D-PCL scaffolds of dissociated EW5 tumor cells (**A**) and SEM imaging of ES cell growth (**B**) in 3D PCL scaffolds as dissociated EW5 cells.

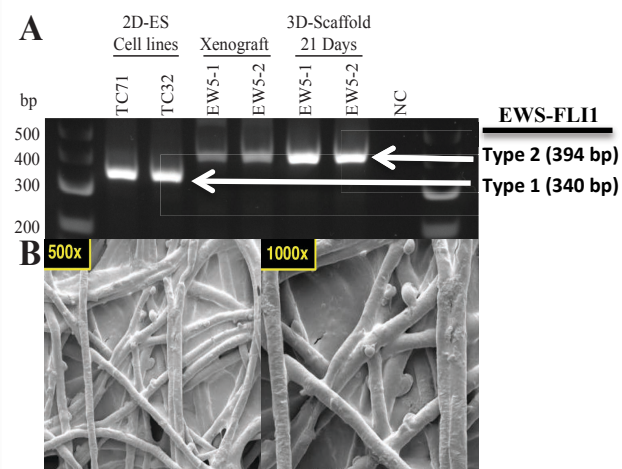

Supplement: NIHMS625416-supplement-01.pdf [file NIHMS625416-supplement-01.pdf]
